# Supplementary material
Source: PubMed Central journal article supplement (PMC9772047)
Supplement: NIHMS1832736-supplement-SUPINFO.pdf [file NIHMS1832736-supplement-SUPINFO.pdf]

## SUPPLEMENTAL MATERIALS

**Table S1. Linear probability and logistic regression models estimating factors associated with specifying a treatment preference for life-extending treatment in the dementia scenario**

|                         | OLS                             | Logistic Regression Coefficients | Logistic Regression Average Marginal Effects |
|-------------------------|---------------------------------|----------------------------------|----------------------------------------------|
| Cognitive Impairment    | −0.013<br>(−0.092 to 0.067)     | −0.053<br>(−0.390 to 0.285)      | −0.012<br>(−0.088 to 0.065)                  |
| Age                     | −0.001<br>(−0.004 to 0.002)     | −0.003<br>(−0.017 to 0.010)      | −0.001<br>(−0.004 to 0.002)                  |
| Female                  | 0.004<br>(−0.051 to 0.060)      | 0.021<br>(−0.226 to 0.267)       | 0.005<br>(−0.051 to 0.060)                   |
| Black                   | −0.205***<br>(−0.280 to −0.130) | −0.865***<br>(−1.181 to −0.550)  | −0.203***<br>(−0.277 to −0.130)              |
| Other                   | −0.078<br>(−0.172 to 0.016)     | −0.336*<br>(−0.732 to 0.060)     | −0.077*<br>(−0.170 to 0.015)                 |
| Hispanic                | −0.121**<br>(−0.215 to −0.026)  | −0.509**<br>(−0.900 to −0.117)   | −0.118**<br>(−0.211 to −0.026)               |
| Married                 | −0.003<br>(−0.063 to 0.057)     | −0.012<br>(−0.277 to 0.254)      | −0.003<br>(−0.062 to 0.057)                  |
| < High School           | −0.075<br>(−0.165 to 0.015)     | −0.313<br>(−0.686 to 0.060)      | −0.072<br>(−0.160 to 0.015)                  |
| College                 | 0.090***<br>(0.029 to 0.152)    | 0.414***<br>(0.128 to 0.701)     | 0.092***<br>(0.030 to 0.154)                 |
| > Median Wealth         | 0.004<br>(−0.057 to 0.065)      | 0.017<br>(−0.249 to 0.283)       | 0.004<br>(−0.056 to 0.064)                   |
| Have Children           | −0.053<br>(−0.140 to 0.034)     | −0.250<br>(−0.664 to 0.164)      | −0.055<br>(−0.144 to 0.034)                  |
| Hospitalized            | −0.032<br>(−0.098 to 0.034)     | −0.145<br>(−0.433 to 0.143)      | −0.033<br>(−0.098 to 0.033)                  |
| Fair/poor Health        | 0.051<br>(−0.015 to 0.117)      | 0.224<br>(−0.068 to 0.515)       | 0.050<br>(−0.014 to 0.113)                   |
| Comorbidities           | −0.003<br>(−0.066 to 0.060)     | −0.014<br>(−0.291 to 0.262)      | −0.003<br>(−0.065 to 0.059)                  |
| Heart Condition         | 0.023<br>(−0.066 to 0.060)      | 0.102<br>(−0.212 to 0.417)       | 0.023<br>(−0.047 to 0.093)                   |
| Parent Dementia         | −0.010<br>(−0.095 to 0.074)     | −0.044<br>(−0.423 to 0.335)      | −0.010<br>(−0.096 to 0.076)                  |
| Missing Parent Dementia | −0.007<br>(−0.067 to 0.053)     | −0.028<br>(−0.293 to 0.237)      | −0.006<br>(−0.066 to 0.053)                  |
| Attends religious       | −0.031<br>(−0.085 to 0.024)     | −0.138<br>(−0.378 to 0.103)      | −0.031<br>(−0.085 to 0.023)                  |
| Constant                | 0.768***<br>(0.556 to 0.981)    | 1.171**<br>(0.213 to 2.128)      | NA                                           |

Notes: OLS= Ordinary Least Squares. Confidence intervals in parentheses. Analyses estimate whether the respondent has a treatment preference (N=1,291). The reference group includes respondents who reported they were ‘unsure’ if they wanted a treatment or not. The logistic regression coefficients are in the log odds scale. The average marginal effects represent the average change in probability. Statistical significance is indicated by \* p<0.10, \*\* p<0.05, \*\*\* p<0.01

**Table S2. Linear probability and logistic regression models estimating factors associated with specifying a treatment preference for limited treatment in the dementia scenario**

|                         | <b>OLS</b>                      | <b>Logistic Regression Coefficients</b> | <b>Logistic Regression Average Marginal Effects</b> |
|-------------------------|---------------------------------|-----------------------------------------|-----------------------------------------------------|
| Cognitive Impairment    | −0.073*<br>(−0.152 to 0.006)    | −0.316*<br>(−0.660 to 0.027)            | −0.066*<br>(−0.140 to 0.008)                        |
| Age                     | −0.006***<br>(−0.009 to −0.003) | −0.031***<br>(−0.045 to −0.017)         | −0.006***<br>(−0.009 to −0.003)                     |
| Female                  | 0.046*<br>(−0.006 to 0.098)     | 0.242*<br>(−0.019 to 0.503)             | 0.048*<br>(−0.004 to 0.100)                         |
| Black                   | −0.073**<br>(−0.141 to −0.004)  | −0.375**<br>(−0.707 to −0.043)          | −0.077**<br>(−0.147 to −0.007)                      |
| Other                   | −0.083*<br>(−0.173 to 0.007)    | −0.413*<br>(−0.827 to 0.001)            | −0.086*<br>(−0.177 to 0.004)                        |
| Hispanic                | −0.119***<br>(−0.208 to −0.030) | −0.558***<br>(−0.961 to −0.156)         | −0.119***<br>(−0.209 to −0.029)                     |
| Married                 | 0.026<br>(−0.032 to 0.084)      | 0.135<br>(−0.150 to 0.419)              | 0.027<br>(−0.030 to 0.084)                          |
| < High School           | −0.041<br>(−0.130 to 0.048)     | −0.174<br>(−0.569 to 0.220)             | −0.035<br>(−0.118 to 0.047)                         |
| College                 | 0.031<br>(−0.027 to 0.088)      | 0.160<br>(−0.143 to 0.463)              | 0.031<br>(−0.027 to 0.090)                          |
| > Median Wealth         | 0.013<br>(−0.044 to 0.070)      | 0.061<br>(−0.223 to 0.345)              | 0.012<br>(−0.044 to 0.069)                          |
| Have Children           | −0.003<br>(−0.088 to 0.082)     | −0.018<br>(−0.464 to 0.427)             | −0.004<br>(−0.092 to 0.084)                         |
| Hospitalized            | 0.018<br>(−0.045 to 0.080)      | 0.081<br>(−0.228 to 0.389)              | 0.016<br>(−0.044 to 0.076)                          |
| Fair/poor Health        | 0.003<br>(−0.060 to 0.067)      | 0.013<br>(−0.295 to 0.321)              | 0.003<br>(−0.058 to 0.064)                          |
| Comorbidities           | −0.008<br>(−0.068 to 0.051)     | −0.045<br>(−0.342 to 0.253)             | −0.009<br>(−0.068 to 0.050)                         |
| Heart Condition         | 0.025<br>(−0.041 to 0.091)      | 0.131<br>(−0.199 to 0.461)              | 0.026<br>(−0.038 to 0.089)                          |
| Parent Dementia         | −0.076*<br>(−0.158 to 0.006)    | −0.390*<br>(−0.786 to 0.006)            | −0.081*<br>(−0.167 to 0.004)                        |
| Missing Parent Dementia | −0.025<br>(−0.080 to 0.029)     | −0.139<br>(−0.421 to 0.142)             | −0.028<br>(−0.083 to 0.028)                         |
| Attends religious       | −0.048*<br>(−0.099 to 0.003)    | −0.251*<br>(−0.507 to 0.006)            | −0.050*<br>(−0.101 to 0.001)                        |
| Constant                | 1.163***<br>(0.962 to 1.364)    | 3.194***<br>(2.158 to 4.230)            | NA                                                  |

Notes: OLS= Ordinary Least Squares. Confidence intervals in parentheses. Analyses estimate whether the respondent has a treatment preference (N=1,291). The reference group includes respondents who reported they were ‘unsure’ if they wanted a treatment or not. The logistic regression coefficients are in the log odds scale. The average marginal effects represent the average change in probability. Statistical significance is indicated by \* p<0.10, \*\* p<0.05, \*\*\* p<0.01

**Table S3. Linear probability and logistic regression models estimating factors associated with specifying a treatment preference for comfort treatment in the dementia scenario**

|                         | <b>OLS</b>                      | <b>Logistic Regression Coefficients</b> | <b>Logistic Regression Average Marginal Effects</b> |
|-------------------------|---------------------------------|-----------------------------------------|-----------------------------------------------------|
| Cognitive Impairment    | -0.033<br>(-0.112 to 0.047)     | -0.139<br>(-0.508 to 0.230)             | -0.027<br>(-0.100 to 0.046)                         |
| Age                     | -0.004***<br>(-0.007 to -0.001) | -0.022***<br>(-0.036 to -0.007)         | -0.004***<br>(-0.007 to -0.001)                     |
| Female                  | 0.052**<br>(0.001 to 0.102)     | 0.276**<br>(0.013 to 0.540)             | 0.053**<br>(0.002 to 0.104)                         |
| Black                   | -0.101***<br>(-0.169 to -0.033) | -0.517***<br>(-0.850 to -0.184)         | -0.104***<br>(-0.174 to -0.034)                     |
| Other                   | -0.047<br>(-0.135 to 0.042)     | -0.249<br>(-0.688 to 0.190)             | -0.049<br>(-0.139 to 0.040)                         |
| Hispanic                | -0.110**<br>(-0.200 to -0.020)  | -0.537**<br>(-0.964 to -0.110)          | -0.110**<br>(-0.203 to -0.017)                      |
| Married                 | 0.003<br>(-0.052 to 0.059)      | 0.031<br>(-0.253 to 0.314)              | 0.006<br>(-0.048 to 0.060)                          |
| < High School           | -0.080*<br>(-0.168 to 0.009)    | -0.354*<br>(-0.752 to 0.044)            | -0.071*<br>(-0.155 to 0.013)                        |
| College                 | 0.032<br>(-0.025 to 0.088)      | 0.183<br>(-0.136 to 0.502)              | 0.034<br>(-0.024 to 0.093)                          |
| > Median Wealth         | 0.046<br>(-0.010 to 0.103)      | 0.237<br>(-0.056 to 0.529)              | 0.045<br>(-0.011 to 0.101)                          |
| Have Children           | 0.020<br>(-0.065 to 0.104)      | 0.101<br>(-0.339 to 0.542)              | 0.020<br>(-0.067 to 0.106)                          |
| Hospitalized            | 0.049<br>(-0.012 to 0.111)      | 0.252<br>(-0.076 to 0.581)              | 0.047<br>(-0.012 to 0.105)                          |
| Fair/poor Health        | 0.038<br>(-0.024 to 0.100)      | 0.191<br>(-0.127 to 0.510)              | 0.036<br>(-0.022 to 0.094)                          |
| Comorbidities           | -0.049*<br>(-0.107 to 0.008)    | -0.262*<br>(-0.565 to 0.041)            | -0.049*<br>(-0.105 to 0.007)                        |
| Heart Condition         | 0.018<br>(-0.047 to 0.084)      | 0.093<br>(-0.244 to 0.430)              | 0.018<br>(-0.045 to 0.080)                          |
| Parent Dementia         | -0.096**<br>(-0.177 to -0.016)  | -0.496**<br>(-0.891 to -0.100)          | -0.101**<br>(-0.186 to -0.016)                      |
| Missing Parent Dementia | -0.018<br>(-0.072 to 0.035)     | -0.107<br>(-0.394 to 0.179)             | -0.020<br>(-0.075 to 0.034)                         |
| Attends religious       | -0.002<br>(-0.051 to 0.048)     | -0.015<br>(-0.274 to 0.244)             | -0.003<br>(-0.052 to 0.046)                         |
| Constant                | 1.01***<br>(0.812 to 1.208)     | 2.478***<br>(1.434 to 3.522)            | NA                                                  |

Notes: OLS= Ordinary Least Squares. Confidence intervals in parentheses. Analyses estimate whether the respondent has a treatment preference (N=1,291). The reference group includes respondents who reported they were 'unsure' if they wanted a treatment or not. The logistic regression coefficients are in the log odds scale. The average marginal effects represent the average change in probability. Statistical significance is indicated by \* p<0.10, \*\* p<0.05, \*\*\* p<0.01

**Table S4. Linear probability and logistic regression models estimating factors associated with specifying a treatment preference for life-extending treatment in the heart attack scenario**

|                         | <b>OLS</b>                      | <b>Logistic Regression Coefficients</b> | <b>Logistic Regression Average Marginal Effects</b> |
|-------------------------|---------------------------------|-----------------------------------------|-----------------------------------------------------|
| Cognitive Impairment    | -0.014<br>(-0.092 to 0.063)     | -0.066<br>(-0.411 to 0.278)             | -0.015<br>(-0.091 to 0.062)                         |
| Age                     | 0.002<br>(-0.001 to 0.005)      | 0.009<br>(-0.004 to 0.023)              | 0.002<br>(-0.001 to 0.005)                          |
| Female                  | -0.047*<br>(-0.102 to 0.008)    | -0.215*<br>(-0.464 to 0.035)            | -0.047*<br>(-0.101 to 0.007)                        |
| Black                   | -0.101***<br>(-0.175 to -0.027) | -0.442***<br>(-0.759 to -0.125)         | -0.101***<br>(-0.174 to -0.027)                     |
| Other                   | -0.031<br>(-0.124 to 0.062)     | -0.133<br>(-0.533 to 0.267)             | -0.030<br>(-0.120 to 0.061)                         |
| Hispanic                | -0.127***<br>(-0.219 to -0.035) | -0.550***<br>(-0.940 to -0.161)         | -0.127***<br>(-0.220 to -0.035)                     |
| Married                 | -0.026<br>(-0.086 to 0.034)     | -0.119<br>(-0.391 to 0.154)             | -0.026<br>(-0.085 to 0.033)                         |
| < High School           | -0.006<br>(-0.092 to 0.079)     | -0.032<br>(-0.411 to 0.347)             | -0.007<br>(-0.091 to 0.077)                         |
| College                 | -0.005<br>(-0.067 to 0.058)     | -0.022<br>(-0.308 to 0.264)             | -0.005<br>(-0.068 to 0.058)                         |
| > Median Wealth         | 0.031<br>(-0.028 to 0.091)      | 0.145<br>(-0.123 to 0.413)              | 0.032<br>(-0.027 to 0.091)                          |
| Have Children           | 0.036<br>(-0.056 to 0.127)      | 0.164<br>(-0.238 to 0.567)              | 0.037<br>(-0.055 to 0.128)                          |
| Hospitalized            | -0.034<br>(-0.100 to 0.033)     | -0.155<br>(-0.457 to 0.148)             | -0.034<br>(-0.102 to 0.033)                         |
| Fair/poor Health        | 0.080**<br>(0.015 to 0.144)     | 0.366**<br>(0.063 to 0.670)             | 0.078**<br>(0.016 to 0.141)                         |
| Comorbidities           | -0.008<br>(-0.071 to 0.054)     | -0.039<br>(-0.316 to 0.239)             | -0.008<br>(-0.069 to 0.052)                         |
| Heart Condition         | 0.025<br>(-0.044 to 0.094)      | 0.117<br>(-0.205 to 0.439)              | 0.025<br>(-0.044 to 0.095)                          |
| Parent Dementia         | -0.006<br>(-0.090 to 0.078)     | -0.024<br>(-0.406 to 0.357)             | -0.005<br>(-0.090 to 0.079)                         |
| Missing Parent Dementia | -0.003<br>(-0.062 to 0.057)     | -0.013<br>(-0.280 to 0.253)             | -0.003<br>(-0.061 to 0.056)                         |
| Attends religious       | -0.045*<br>(-0.099 to 0.009)    | -0.205*<br>(-0.448 to 0.038)            | -0.045*<br>(-0.099 to 0.008)                        |
| Constant                | 0.570***<br>(0.358 to 0.782)    | 0.252<br>(-0.710 to 1.214)              | NA                                                  |

Notes: OLS= Ordinary Least Squares. Confidence intervals in parentheses. Analyses estimate whether the respondent has a treatment preference (N=1,291). The reference group includes respondents who reported they were 'unsure' if they wanted a treatment or not. The logistic regression coefficients are in the log odds scale. The average marginal effects represent the average change in probability. Statistical significance is indicated by \* p<0.10, \*\* p<0.05, \*\*\* p<0.01

**Table S5. Linear probability and logistic regression models estimating factors associated with specifying a treatment preference for limited treatment in the heart attack scenario**

|                         | <b>OLS</b>                      | <b>Logistic Regression Coefficients</b> | <b>Logistic Regression Average Marginal Effects</b> |
|-------------------------|---------------------------------|-----------------------------------------|-----------------------------------------------------|
| Cognitive Impairment    | -0.085**<br>(-0.163 to -0.006)  | -0.371**<br>(-0.715 to -0.027)          | -0.079**<br>(-0.154 to -0.003)                      |
| Age                     | -0.005***<br>(-0.008 to -0.002) | -0.024***<br>(-0.038 to -0.010)         | -0.005***<br>(-0.008 to -0.002)                     |
| Female                  | 0.036<br>(-0.017 to 0.089)      | 0.186<br>(-0.075 to 0.446)              | 0.038<br>(-0.015 to 0.090)                          |
| Black                   | -0.011<br>(-0.077 to 0.056)     | -0.062<br>(-0.391 to 0.268)             | -0.013<br>(-0.080 to 0.055)                         |
| Other                   | -0.034<br>(-0.124 to 0.056)     | -0.168<br>(-0.589 to 0.253)             | -0.035<br>(-0.123 to 0.054)                         |
| Hispanic                | -0.132***<br>(-0.221 to -0.043) | 0.603***<br>(-1.000 to -0.206)          | -0.131***<br>(-0.221 to -0.040)                     |
| Married                 | 0.038<br>(-0.020 to 0.095)      | 0.191<br>(-0.088 to 0.469)              | 0.039<br>(-0.018 to 0.096)                          |
| < High School           | -0.056<br>(-0.144 to 0.032)     | -0.244<br>(-0.633 to 0.145)             | -0.051<br>(-0.135 to 0.033)                         |
| College                 | 0.018<br>(-0.040 to 0.076)      | 0.094<br>(-0.207 to 0.395)              | 0.019<br>(-0.041 to 0.079)                          |
| > Median Wealth         | 0.044<br>(-0.013 to 0.102)      | 0.215<br>(-0.068 to 0.499)              | 0.043<br>(-0.014 to 0.101)                          |
| Have Children           | -0.049<br>(-0.129 to 0.032)     | -0.256<br>(-0.690 to 0.179)             | -0.050<br>(-0.130 to 0.031)                         |
| Hospitalized            | 0.030<br>(-0.032 to 0.091)      | 0.143<br>(-0.164 to 0.451)              | 0.028<br>(-0.032 to 0.089)                          |
| Fair/poor Health        | 0.035<br>(-0.028 to 0.097)      | 0.168<br>(-0.139 to 0.474)              | 0.033<br>(-0.026 to 0.093)                          |
| Comorbidities           | -0.006<br>(-0.066 to 0.053)     | -0.031<br>(-0.325 to 0.262)             | -0.006<br>(-0.065 to 0.053)                         |
| Heart Condition         | -0.002<br>(-0.069 to 0.065)     | -0.009<br>(-0.336 to 0.318)             | -0.002<br>(-0.068 to 0.064)                         |
| Parent Dementia         | -0.100**<br>(-0.185 to -0.015)  | -0.467**<br>(-0.854 to -0.081)          | -0.100**<br>(-0.186 to -0.014)                      |
| Missing Parent Dementia | 0.021<br>(-0.035 to 0.077)      | 0.100<br>(-0.183 to 0.383)              | 0.020<br>(-0.037 to 0.077)                          |
| Attends religious       | -0.039<br>(-0.091 to 0.013)     | -0.196<br>(-0.450 to 0.057)             | -0.040<br>(-0.091 to 0.011)                         |
| Constant                | 1.051***<br>(0.855 to 1.248)    | 2.598***<br>(1.599 to 3.596)            | NA                                                  |

Notes: OLS= Ordinary Least Squares. Confidence intervals in parentheses. Analyses estimate whether the respondent has a treatment preference (N=1,291). The reference group includes respondents who reported they were 'unsure' if they wanted a treatment or not. The logistic regression coefficients are in the log odds scale. The average marginal effects represent the average change in probability. Statistical significance is indicated by \* p<0.10, \*\* p<0.05, \*\*\* p<0.01

**Table S6. Linear probability and logistic regression models estimating factors associated with specifying a treatment preference for comfort treatment in the heart attack scenario**

|                         | <b>OLS</b>                      | <b>Logistic Regression Coefficients</b> | <b>Logistic Regression Average Marginal Effects</b> |
|-------------------------|---------------------------------|-----------------------------------------|-----------------------------------------------------|
| Cognitive Impairment    | -0.034<br>(-0.112 to 0.045)     | -0.146<br>(-0.514 to 0.223)             | -0.028<br>(-0.100 to 0.044)                         |
| Age                     | -0.004***<br>(-0.007 to -0.002) | -0.023***<br>(-0.038 to -0.008)         | -0.004***<br>(-0.007 to -0.002)                     |
| Female                  | 0.027<br>(-0.023 to 0.077)      | 0.150<br>(-0.116 to 0.416)              | 0.028<br>(-0.022 to 0.079)                          |
| Black                   | -0.079**<br>(-0.147 to -0.010)  | -0.408**<br>(-0.748 to -0.069)          | -0.080**<br>(-0.150 to -0.011)                      |
| Other                   | -0.056<br>(-0.143 to 0.030)     | -0.299<br>(-0.727 to 0.130)             | -0.059<br>(-0.146 to 0.029)                         |
| Hispanic                | -0.105**<br>(-0.192 to -0.018)  | -0.508**<br>(-0.923 to -0.092)          | -0.103**<br>(-0.191 to -0.014)                      |
| Married                 | -0.001<br>(-0.056 to 0.054)     | 0.006<br>(-0.280 to 0.292)              | 0.001<br>(-0.053 to 0.055)                          |
| < High School           | -0.029<br>(-0.115 to 0.057)     | -0.118<br>(-0.518 to 0.282)             | -0.023<br>(-0.101 to 0.055)                         |
| College                 | 0.070**<br>(0.015 to 0.125)     | 0.409**<br>(0.082 to 0.736)             | 0.074**<br>(0.018 to 0.131)                         |
| > Median Wealth         | 0.077***<br>(0.020 to 0.133)    | 0.399***<br>(0.102 to 0.695)            | 0.075***<br>(0.019 to 0.131)                        |
| Have Children           | -0.039<br>(-0.117 to 0.040)     | -0.277<br>(-0.692 to 0.238)             | -0.041<br>(-0.122 to 0.039)                         |
| Hospitalized            | 0.049<br>(-0.011 to 0.108)      | 0.255<br>(-0.071 to 0.582)              | 0.047<br>(-0.011 to 0.104)                          |
| Fair/poor Health        | 0.071**<br>(0.010 to 0.132)     | 0.366**<br>(0.041 to 0.690)             | 0.066**<br>(0.010 to 0.122)                         |
| Comorbidities           | -0.027<br>(-0.084 to 0.030)     | -0.143<br>(-0.441 to 0.155)             | -0.027<br>(-0.082 to 0.028)                         |
| Heart Condition         | 0.036<br>(-0.029 to 0.101)      | 0.189<br>(-0.161 to 0.539)              | 0.035<br>(-0.028 to 0.098)                          |
| Parent Dementia         | -0.065<br>(-0.143 to 0.013)     | -0.346*<br>(-0.753 to 0.060)            | -0.068*<br>(-0.152 to 0.015)                        |
| Missing Parent Dementia | -0.029<br>(-0.083 to 0.025)     | -0.161<br>(-0.451 to 0.128)             | -0.030<br>(-0.085 to 0.024)                         |
| Attends religious       | -0.014<br>(-0.064 to 0.036)     | -0.080<br>(-0.343 to 0.183)             | -0.015<br>(-0.064 to 0.034)                         |
| Constant                | 1.038***<br>(0.841 to 1.234)    | 2.673***<br>(1.607 to 3.740)            | NA                                                  |

Notes: OLS= Ordinary Least Squares. Confidence intervals in parentheses. Analyses estimate whether the respondent has a treatment preference (N=1,291). The reference group includes respondents who reported they were 'unsure' if they wanted a treatment or not. The logistic regression coefficients are in the log odds scale. The average marginal effects represent the average change in probability. Statistical significance is indicated by \* p<0.10, \*\* p<0.05, \*\*\* p<0.01

**Table S7. Linear probability and logistic regression models estimating factors associated with wanting life-extending treatment in the dementia scenario**

|                         | <b>OLS</b>                      | <b>Logistic Regression Coefficients</b> | <b>Logistic Regression Average Marginal Effects</b> |
|-------------------------|---------------------------------|-----------------------------------------|-----------------------------------------------------|
| Cognitive Impairment    | 0.101**<br>(0.003 to 0.200)     | 0.563**<br>(0.013 to 1.113)             | 0.091**<br>(-0.005 to 0.188)                        |
| Age                     | -0.005***<br>(-0.008 to -0.002) | -0.038***<br>(-0.060 to -0.016)         | -0.006***<br>(-0.009 to -0.002)                     |
| Female                  | -0.080***<br>(-0.140 to -0.020) | -0.532***<br>(-0.930 to -0.134)         | -0.080***<br>(-0.140 to -0.020)                     |
| Black                   | 0.228***<br>(0.129 to 0.326)    | 1.209***<br>(0.721 to 1.697)            | 0.217***<br>(0.118 to 0.316)                        |
| Other                   | 0.064<br>(-0.046 to 0.174)      | 0.374<br>(-0.233 to 0.981)              | 0.059<br>(-0.042 to 0.160)                          |
| Hispanic                | 0.002<br>(-0.104 to 0.108)      | 0.061<br>(-0.558 to 0.681)              | 0.009<br>(-0.084 to 0.102)                          |
| Married                 | 0.060*<br>(-0.001 to 0.122)     | 0.428**<br>(0.001 to 0.855)             | 0.061**<br>(0.002 to 0.120)                         |
| < High School           | 0.051<br>(-0.068 to 0.169)      | 0.327<br>(-0.329 to 0.983)              | 0.051<br>(-0.057 to 0.159)                          |
| College                 | -0.010<br>(-0.071 to 0.050)     | -0.062<br>(-0.503 to 0.380)             | -0.009<br>(-0.073 to 0.055)                         |
| > Median Wealth         | -0.066**<br>(-0.129 to -0.003)  | -0.454**<br>(-0.874 to -0.034)          | -0.068**<br>(-0.131 to -0.005)                      |
| Have Children           | -0.013<br>(-0.104 to 0.078)     | -0.072<br>(-0.658 to 0.513)             | -0.011<br>(-0.099 to 0.078)                         |
| Hospitalized            | 0.049<br>(-0.029 to 0.127)      | 0.373<br>(-0.110 to 0.857)              | 0.057<br>(-0.020 to 0.135)                          |
| Fair/poor Health        | -0.025<br>(-0.099 to 0.048)     | -0.163<br>(-0.631 to 0.304)             | -0.024<br>(-0.090 to 0.043)                         |
| Comorbidities           | 0.040<br>(-0.026 to 0.106)      | 0.291<br>(-0.177 to 0.760)              | 0.042<br>(-0.024 to 0.108)                          |
| Heart Condition         | 0.039<br>(-0.034 to 0.112)      | 0.289<br>(-0.180 to 0.759)              | 0.044<br>(-0.029 to 0.117)                          |
| Parent Dementia         | -0.055<br>(-0.138 to 0.027)     | -0.450<br>(-1.123 to 0.224)             | -0.061<br>(-0.144 to 0.022)                         |
| Missing Parent Dementia | 0.002<br>(-0.064 to 0.067)      | 0.023<br>(-0.390 to 0.437)              | 0.003<br>(-0.057 to 0.064)                          |
| Attends religious       | 0.036<br>(-0.020 to 0.091)      | 0.230<br>(-0.139 to 0.599)              | 0.034<br>(-0.021 to 0.089)                          |
| Constant                | 0.501***<br>(0.281 to 0.721)    | 0.693<br>(-0.808 to 2.195)              | NA                                                  |

Notes: OLS= Ordinary Least Squares. Confidence intervals in parentheses. Models estimate whether the respondent reported that they would ‘want’ the treatment option conditional on having a treatment preference (N=783). The reference group are those who would ‘not want’ the treatment option. Analyses are restricted to respondents who had a treatment preference (i.e., those who selected ‘unsure’ are excluded). The logistic regression coefficients are in the log odds scale. The average marginal effects represent the average change in probability. Statistical significance is indicated by \* p<0.10, \*\* p<0.05, \*\*\* p<0.01

**Table S8. Linear probability and logistic regression models estimating factors associated with wanting limited treatment in the dementia scenario**

|                         | <b>OLS</b>                      | <b>Logistic Regression Coefficients</b> | <b>Logistic Regression Average Marginal Effects</b> |
|-------------------------|---------------------------------|-----------------------------------------|-----------------------------------------------------|
| Cognitive Impairment    | 0.009<br>(-0.080 to 0.097)      | 0.043<br>(-0.458 to 0.543)              | 0.008<br>(-0.083 to 0.098)                          |
| Age                     | -0.003**<br>(-0.007 to -0.000)  | -0.018**<br>(-0.036 to -0.000)          | -0.003**<br>(-0.007 to -0.000)                      |
| Female                  | 0.032<br>(-0.029 to 0.092)      | 0.175<br>(-0.146 to 0.496)              | 0.032<br>(-0.027 to 0.092)                          |
| Black                   | 0.131***<br>(0.063 to 0.198)    | 0.874***<br>(0.374 to 1.374)            | 0.142***<br>(0.073 to 0.210)                        |
| Other                   | 0.045<br>(-0.059 to 0.150)      | 0.226<br>(-0.351 to 0.804)              | 0.040<br>(-0.058 to 0.138)                          |
| Hispanic                | -0.021<br>(-0.122 to 0.079)     | -0.122<br>(-0.655 to 0.412)             | -0.023<br>(-0.124 to 0.078)                         |
| Married                 | 0.044<br>(-0.023 to 0.111)      | 0.240<br>(-0.131 to 0.611)              | 0.045<br>(-0.025 to 0.114)                          |
| < High School           | -0.031<br>(-0.126 to 0.063)     | -0.182<br>(-0.717 to 0.353)             | -0.034<br>(-0.137 to 0.069)                         |
| College                 | -0.044<br>(-0.115 to 0.026)     | -0.225<br>(-0.581 to 0.132)             | -0.042<br>(-0.110 to 0.026)                         |
| > Median Wealth         | -0.126***<br>(-0.194 to -0.057) | -0.689***<br>(-1.071 to -0.307)         | -0.126***<br>(-0.194 to -0.058)                     |
| Have Children           | 0.093*<br>(-0.010 to 0.196)     | 0.485*<br>(-0.015 to 0.985)             | 0.095*<br>(-0.008 to 0.199)                         |
| Hospitalized            | 0.065*<br>(-0.003 to 0.133)     | 0.342*<br>(-0.048 to 0.733)             | 0.060*<br>(-0.006 to 0.126)                         |
| Fair/poor Health        | -0.045<br>(-0.116 to 0.027)     | -0.261<br>(-0.652 to 0.131)             | -0.049<br>(-0.123 to 0.026)                         |
| Comorbidities           | -0.036<br>(-0.106 to 0.033)     | -0.198<br>(-0.571 to 0.175)             | -0.036<br>(-0.103 to 0.031)                         |
| Heart Condition         | 0.035<br>(-0.041 to 0.111)      | 0.193<br>(-0.210 to 0.595)              | 0.035<br>(-0.036 to 0.105)                          |
| Parent Dementia         | -0.029<br>(-0.127 to 0.070)     | -0.139<br>(-0.623 to 0.345)             | -0.026<br>(-0.118 to 0.066)                         |
| Missing Parent Dementia | 0.037<br>(-0.024 to 0.099)      | 0.203<br>(-0.138 to 0.544)              | 0.037<br>(-0.025 to 0.099)                          |
| Attends religious       | 0.037<br>(-0.023 to 0.096)      | 0.206<br>(-0.115 to 0.527)              | 0.038<br>(-0.021 to 0.096)                          |
| Constant                | 0.858***<br>(0.618 to 1.099)    | 1.747***<br>(0.495 to 2.999)            | NA                                                  |

Notes: OLS= Ordinary Least Squares. Confidence intervals in parentheses. Models estimate whether the respondent reported that they would ‘want’ the treatment option conditional on having a treatment preference (N=901). The reference group are those who would ‘not want’ the treatment option. Analyses are restricted to respondents who had a treatment preference (i.e., those who selected ‘unsure’ are excluded). The logistic regression coefficients are in the log odds scale. The average marginal effects represent the average change in probability. Statistical significance is indicated by \* p<0.10, \*\* p<0.05, \*\*\* p<0.01



**Table S9. Linear probability and logistic regression models estimating factors associated with wanting comfort treatment in the dementia scenario**

|                         | <b>OLS</b>                      | <b>Logistic Regression Coefficients</b> | <b>Logistic Regression Average Marginal Effects</b> |
|-------------------------|---------------------------------|-----------------------------------------|-----------------------------------------------------|
| Cognitive Impairment    | -0.001<br>(-0.070 to 0.068)     | 0.034<br>(-0.627 to 0.695)              | 0.003<br>(-0.052 to 0.058)                          |
| Age                     | -0.004***<br>(-0.006 to -0.001) | -0.042***<br>(-0.067 to -0.017)         | -0.004***<br>(-0.006 to -0.001)                     |
| Female                  | 0.025<br>(-0.016 to 0.065)      | 0.302<br>(-0.170 to 0.774)              | 0.026<br>(-0.015 to 0.067)                          |
| Black                   | -0.046<br>(-0.103 to 0.012)     | -0.527*<br>(-1.134 to 0.081)            | -0.051*<br>(-0.116 to 0.015)                        |
| Other                   | -0.025<br>(-0.102 to 0.052)     | -0.314<br>(-1.143 to 0.515)             | -0.029<br>(-0.113 to 0.055)                         |
| Hispanic                | -0.043<br>(-0.124 to 0.037)     | -0.448<br>(-1.259 to 0.363)             | -0.043<br>(-0.131 to 0.044)                         |
| Married                 | -0.003<br>(-0.048 to 0.043)     | 0.007<br>(-0.515 to 0.529)              | 0.001<br>(-0.044 to 0.045)                          |
| < High School           | -0.004<br>(-0.083 to 0.076)     | -0.018<br>(-0.787 to 0.750)             | -0.002<br>(-0.067 to 0.064)                         |
| College                 | 0.041*<br>(-0.002 to 0.083)     | 0.565*<br>(-0.029 to 1.158)             | 0.043*<br>(0.002 to 0.084)                          |
| > Median Wealth         | 0.002<br>(-0.049 to 0.052)      | 0.002<br>(-0.573 to 0.577)              | 0.0002<br>(-0.049 to 0.049)                         |
| Have Children           | 0.017<br>(-0.050 to 0.083)      | 0.132<br>(-0.645 to 0.910)              | 0.012<br>(-0.060 to 0.083)                          |
| Hospitalized            | 0.008<br>(-0.038 to 0.054)      | 0.083<br>(-0.448 to 0.615)              | 0.007<br>(-0.037 to 0.050)                          |
| Fair/poor Health        | -0.010<br>(-0.064 to 0.044)     | -0.096<br>(-0.678 to 0.485)             | -0.008<br>(-0.059 to 0.043)                         |
| Comorbidities           | 0.011<br>(-0.034 to 0.057)      | 0.120<br>(-0.414 to 0.653)              | 0.010<br>(-0.036 to 0.057)                          |
| Heart Condition         | 0.011<br>(-0.039 to 0.061)      | 0.132<br>(-0.469 to 0.734)              | 0.011<br>(-0.038 to 0.060)                          |
| Parent Dementia         | 0.023<br>(-0.034 to 0.079)      | 0.301<br>(-0.507 to 1.110)              | 0.023<br>(-0.034 to 0.080)                          |
| Missing Parent Dementia | 0.006<br>(-0.036 to 0.048)      | 0.077<br>(-0.417 to 0.570)              | 0.007<br>(-0.035 to 0.048)                          |
| Attends religious       | 0.02.<br>(-0.020 to 0.059)      | 0.234<br>(-0.230 to 0.699)              | 0.020<br>(-0.019 to 0.059)                          |
| Constant                | 1.103***<br>(0.948 to 1.258)    | 4.595***<br>(2.829 to 6.361)            | NA                                                  |

Notes: OLS= Ordinary Least Squares. Confidence intervals in parentheses. Models estimate whether the respondent reported that they would 'want' the treatment option conditional on having a treatment preference (N=933). The reference group are those who would 'not want' the treatment option. Analyses are restricted to respondents who had a treatment preference (i.e., those who selected 'unsure' are excluded). The logistic regression coefficients are in the log odds scale. The average marginal effects represent the average change in probability. Statistical significance is indicated by \* p<0.10, \*\* p<0.05, \*\*\* p<0.01

**Table S10. Linear probability and logistic regression models estimating factors associated with wanting life-extending treatment in the heart attack scenario**

|                         | <b>OLS</b>                      | <b>Logistic Regression Coefficients</b> | <b>Logistic Regression Average Marginal Effects</b> |
|-------------------------|---------------------------------|-----------------------------------------|-----------------------------------------------------|
| Cognitive Impairment    | 0.098**<br>(0.008 to 0.189)     | 0.570**<br>(0.062 to 1.078)             | 0.096**<br>(0.004 to 0.188)                         |
| Age                     | -0.006***<br>(-0.010 to -0.003) | -0.044***<br>(-0.065 to -0.022)         | -0.007***<br>(-0.010 to -0.004)                     |
| Female                  | -0.021<br>(-0.078 to 0.037)     | -0.143<br>(-0.512 to 0.227)             | -0.022<br>(-0.079 to 0.035)                         |
| Black                   | 0.198***<br>(0.110 to 0.286)    | 1.070***<br>(0.627 to 1.513)            | 0.194***<br>(0.105 to 0.283)                        |
| Other                   | 0.057<br>(-0.048 to 0.162)      | 0.366<br>(-0.230 to 0.962)              | 0.060<br>(-0.043 to 0.163)                          |
| Hispanic                | -0.060<br>(-0.160 to 0.039)     | -0.366<br>(-1.013 to 0.281)             | -0.053<br>(-0.139 to 0.034)                         |
| Married                 | 0.042<br>(-0.020 to 0.104)      | 0.305<br>(-0.101 to 0.712)              | 0.046<br>(-0.014 to 0.105)                          |
| < High School           | 0.051<br>(-0.052 to 0.153)      | 0.343<br>(-0.241 to 0.927)              | 0.056<br>(-0.045 to 0.156)                          |
| College                 | 0.018<br>(-0.045 to 0.081)      | 0.145<br>(-0.273 to 0.564)              | 0.023<br>(-0.043 to 0.089)                          |
| > Median Wealth         | -0.027<br>(-0.088 to 0.034)     | -0.190<br>(-0.588 to 0.207)             | -0.029<br>(-0.091 to 0.032)                         |
| Have Children           | -0.041<br>(-0.141 to 0.058)     | -0.272<br>(-0.846 to 0.303)             | -0.044<br>(-0.141 to 0.053)                         |
| Hospitalized            | 0.027<br>(-0.044 to 0.098)      | 0.187<br>(-0.247 to 0.622)              | 0.029<br>(-0.040 to 0.099)                          |
| Fair/poor Health        | -0.021<br>(-0.092 to 0.051)     | -0.133<br>(-0.578 to 0.312)             | -0.020<br>(-0.086 to 0.046)                         |
| Comorbidities           | 0.066**<br>(0.001 to 0.131)     | 0.446**<br>(0.009 to 0.884)             | 0.066**<br>(0.004 to 0.129)                         |
| Heart Condition         | 0.043<br>(-0.029 to 0.115)      | 0.301<br>(-0.140 to 0.742)              | 0.048<br>(-0.024 to 0.119)                          |
| Parent Dementia         | -0.067<br>(-0.152 to 0.017)     | -0.490<br>(-1.115 to 0.135)             | -0.069<br>(-0.147 to 0.010)                         |
| Missing Parent Dementia | -0.011<br>(-0.077 to 0.054)     | -0.073<br>(-0.469 to 0.323)             | -0.011<br>(-0.072 to 0.050)                         |
| Attends religious       | 0.022<br>(-0.033 to 0.078)      | 0.143<br>(-0.212 to 0.499)              | 0.022<br>(-0.033 to 0.077)                          |
| Constant                | 0.572***<br>(0.348 to 0.797)    | 1.037<br>(-0.405 to 2.480)              | NA                                                  |

Notes: OLS= Ordinary Least Squares. Confidence intervals in parentheses. Models estimate whether the respondent reported that they would ‘want’ the treatment option conditional on having a treatment preference (N=841). The reference group are those who would ‘not want’ the treatment option. Analyses are restricted to respondents who had a treatment preference (i.e., those who selected ‘unsure’ are excluded). The logistic regression coefficients are in the log odds scale. The average marginal effects represent the average change in probability. Statistical significance is indicated by \* p<0.10, \*\* p<0.05, \*\*\* p<0.01

**Table S11. Linear probability and logistic regression models associated with wanting limited treatment in the heart attack scenario**

|                         | <b>OLS</b>                      | <b>Logistic Regression Coefficients</b> | <b>Logistic Regression Average Marginal Effects</b> |
|-------------------------|---------------------------------|-----------------------------------------|-----------------------------------------------------|
| Cognitive Impairment    | -0.065<br>(-0.161 to 0.031)     | -0.341<br>(-0.822 to 0.139)             | -0.066<br>(-0.162 to 0.031)                         |
| Age                     | -0.008***<br>(-0.011 to -0.004) | -0.040***<br>(-0.057 to -0.022)         | -0.007***<br>(-0.010 to -0.004)                     |
| Female                  | 0.075**<br>(0.013 to 0.136)     | 0.413**<br>(0.087 to 0.738)             | 0.076**<br>(0.016 to 0.137)                         |
| Black                   | 0.092**<br>(0.019 to 0.164)     | 0.542**<br>(0.087 to 0.998)             | 0.093**<br>(0.021 to 0.164)                         |
| Other                   | 0.032<br>(-0.075 to 0.138)      | 0.191<br>(-0.425 to 0.807)              | 0.034<br>(-0.071 to 0.139)                          |
| Hispanic                | -0.039<br>(-0.141 to 0.063)     | -0.239<br>(-0.798 to 0.319)             | -0.045<br>(-0.154 to 0.064)                         |
| Married                 | 0.080**<br>(0.013 to 0.147)     | 0.439**<br>(0.077 to 0.802)             | 0.082**<br>(0.014 to 0.151)                         |
| < High School           | 0.069<br>(-0.022 to 0.161)      | 0.380<br>(-0.155 to 0.915)              | 0.065<br>(-0.020 to 0.150)                          |
| College                 | 0.035<br>(-0.034 to 0.104)      | 0.189<br>(-0.183 to 0.562)              | 0.034<br>(-0.032 to 0.100)                          |
| > Median Wealth         | -0.046<br>(-0.115 to 0.023)     | -0.258<br>(-0.635 to 0.119)             | -0.047<br>(-0.115 to 0.021)                         |
| Have Children           | 0.008<br>(-0.089 to 0.104)      | 0.038<br>(-0.476 to 0.551)              | 0.007<br>(-0.088 to 0.102)                          |
| Hospitalized            | 0.057<br>(-0.013 to 0.126)      | 0.309<br>(-0.082 to 0.700)              | 0.054<br>(-0.012 to 0.120)                          |
| Fair/poor Health        | -0.017<br>(-0.088 to 0.053)     | -0.089<br>(-0.465 to 0.288)             | -0.016<br>(-0.086 to 0.054)                         |
| Comorbidities           | -0.002<br>(-0.070 to 0.067)     | -0.012<br>(-0.388 to 0.364)             | -0.002<br>(-0.071 to 0.066)                         |
| Heart Condition         | -0.009<br>(-0.086 to 0.068)     | -0.041<br>(-0.442 to 0.360)             | -0.007<br>(-0.081 to 0.066)                         |
| Parent Dementia         | 0.037<br>(-0.063 to 0.137)      | 0.197<br>(-0.351 to 0.746)              | 0.035<br>(-0.059 to 0.128)                          |
| Missing Parent Dementia | 0.042<br>(-0.022 to 0.106)      | 0.226<br>(-0.127 to 0.578)              | 0.041<br>(-0.023 to 0.105)                          |
| Attends religious       | 0.033<br>(-0.026 to 0.092)      | 0.194<br>(-0.125 to 0.514)              | 0.035<br>(-0.023 to 0.093)                          |
| Constant                | 1.091***<br>(0.863 to 1.319)    | 2.876***<br>(1.689 to 4.063)            | NA                                                  |

Notes: OLS= Ordinary Least Squares. Confidence intervals in parentheses. Models estimate whether the respondent reported that they would 'want' the treatment option conditional on having a treatment preference (N=894). The reference group are those who would 'not want' the treatment option. Analyses are restricted to respondents who had a treatment preference (i.e., those who selected 'unsure' are excluded). The logistic regression coefficients are in the log odds scale. The average marginal effects represent the average change in probability. Statistical significance is indicated by \* p<0.10, \*\* p<0.05, \*\*\* p<0.01

**Table S12. Linear probability and logistic regression models estimating factors associated with wanting comfort treatment in the heart attack scenario**

|                         | <b>OLS</b>                      | <b>Logistic Regression Coefficients</b> | <b>Logistic Regression Average Marginal Effects</b> |
|-------------------------|---------------------------------|-----------------------------------------|-----------------------------------------------------|
| Cognitive Impairment    | -0.085**<br>(-0.167 to -0.002)  | -0.617**<br>(-1.203 to -0.031)          | -0.071**<br>(-0.147 to 0.006)                       |
| Age                     | -0.004***<br>(-0.006 to -0.001) | -0.036***<br>(-0.058 to -0.013)         | -0.004***<br>(-0.006 to -0.001)                     |
| Female                  | 0.030<br>(-0.014 to 0.074)      | 0.301<br>(-0.127 to 0.729)              | 0.030<br>(-0.013 to 0.074)                          |
| Black                   | -0.067**<br>(-0.130 to -0.003)  | -0.658**<br>(-1.235 to -0.082)          | -0.075**<br>(-0.149 to -0.000)                      |
| Other                   | -0.011<br>(-0.091 to 0.069)     | -0.132<br>(-0.910 to 0.647)             | -0.013<br>(-0.096 to 0.069)                         |
| Hispanic                | -0.063<br>(-0.148 to 0.022)     | -0.603<br>(-1.321 to 0.116)             | -0.069<br>(-0.164 to 0.025)                         |
| Married                 | -0.003<br>(-0.050 to 0.044)     | -0.006<br>(-0.477 to 0.465)             | -0.001<br>(-0.047 to 0.046)                         |
| < High School           | 0.043<br>(-0.039 to 0.125)      | 0.415<br>(-0.340 to 1.169)              | 0.037<br>(-0.023 to 0.096)                          |
| College                 | 0.053**<br>(0.006 to 0.099)     | 0.587**<br>(0.044 to 1.130)             | 0.053**<br>(0.008 to 0.098)                         |
| > Median Wealth         | -0.027<br>(-0.080 to 0.025)     | -0.303<br>(-0.835 to 0.228)             | -0.030<br>(-0.082 to 0.022)                         |
| Have Children           | 0.019<br>(-0.052 to 0.089)      | 0.129<br>(-0.573 to 0.831)              | 0.013<br>(-0.061 to 0.088)                          |
| Hospitalized            | 0.033<br>(-0.014 to 0.080)      | 0.329<br>(-0.189 to 0.847)              | 0.031<br>(-0.014 to 0.076)                          |
| Fair/poor Health        | -0.046<br>(-0.104 to 0.012)     | -0.426<br>(-0.945 to 0.093)             | -0.045<br>(-0.104 to 0.014)                         |
| Comorbidities           | 0.044*<br>(-0.004 to 0.092)     | 0.445*<br>(-0.048 to 0.937)             | 0.046*<br>(-0.007 to 0.099)                         |
| Heart Condition         | -0.020<br>(-0.073 to 0.033)     | -0.194<br>(-0.754 to 0.366)             | -0.020<br>(-0.079 to 0.039)                         |
| Parent Dementia         | 0.024<br>(-0.041 to 0.090)      | 0.248<br>(-0.419 to 0.916)              | 0.023<br>(-0.035 to 0.081)                          |
| Missing Parent Dementia | 0.044*<br>(-0.003 to 0.090)     | 0.451*<br>(-0.008 to 0.910)             | 0.044*<br>(-0.001 to 0.090)                         |
| Attends religious       | 0.030<br>(-0.012 to 0.073)      | 0.312<br>(-0.119 to 0.743)              | 0.031<br>(-0.012 to 0.073)                          |
| Constant                | 1.058***<br>(0.896 to 1.220)    | 3.898***<br>(2.301 to 5.496)            | NA                                                  |

Notes: OLS= Ordinary Least Squares. Confidence intervals in parentheses. Models estimate whether the respondent reported that they would ‘want’ the treatment option conditional on having a treatment preference (N=939). The reference group are those who would ‘not want’ the treatment option. Analyses are restricted to respondents who had a treatment preference (i.e., those who selected ‘unsure’ are excluded). The logistic regression coefficients are in the log odds scale. The average marginal effects represent the average change in probability. Statistical significance is indicated by \* p<0.10, \*\* p<0.05, \*\*\* p<0.01

**Table S13. Linear probability models estimating factors associated with specifying a treatment preference with a more restrictive cognitive impairment measure for minority respondents for the dementia scenario**

|                         | Life-extending                  | Limited                         | Comfort                         |
|-------------------------|---------------------------------|---------------------------------|---------------------------------|
| Cognitive Impairment    | -0.009<br>(-0.093 to 0.076)     | -0.043<br>(-0.127 to 0.041)     | -0.004<br>(-0.087 to 0.080)     |
| Age                     | -0.001<br>(-0.004 to 0.002)     | -0.006***<br>(-0.009 to -0.004) | -0.004***<br>(-0.007 to -0.002) |
| Female                  | 0.004<br>(-0.051 to 0.060)      | 0.047*<br>(-0.005 to 0.098)     | 0.052**<br>(0.002 to 0.103)     |
| Black                   | -0.206***<br>(-0.281 to -0.132) | -0.078**<br>(-0.146 to -0.010)  | -0.104***<br>(-0.172 to -0.037) |
| Other                   | -0.079*<br>(-0.172 to 0.014)    | -0.092**<br>(-0.181 to -0.003)  | -0.051<br>(-0.139 to 0.036)     |
| Hispanic                | -0.121**<br>(-0.216 to -0.027)  | -0.121***<br>(-0.210 to -0.032) | -0.112**<br>(-0.202 to -0.022)  |
| Married                 | -0.003<br>(-0.064 to 0.057)     | 0.025<br>(-0.033 to 0.083)      | 0.002<br>(-0.053 to 0.058)      |
| < High School           | -0.076*<br>(-0.166 to 0.013)    | -0.049<br>(-0.137 to 0.040)     | -0.086*<br>(-0.174 to 0.002)    |
| College                 | 0.091***<br>(0.029 to 0.152)    | 0.033<br>(-0.024 to 0.091)      | 0.034<br>(-0.023 to 0.091)      |
| > Median Wealth         | 0.004<br>(-0.057 to 0.065)      | 0.014<br>(-0.044 to 0.071)      | 0.047<br>(-0.009 to 0.104)      |
| Have Children           | -0.054<br>(-0.141 to 0.033)     | -0.004<br>(-0.089 to 0.081)     | 0.020<br>(-0.065 to 0.104)      |
| Hospitalized            | -0.032<br>(-0.098 to 0.034)     | 0.019<br>(-0.043 to 0.082)      | 0.050<br>(-0.011 to 0.112)      |
| Fair/poor Health        | 0.051<br>(-0.015 to 0.117)      | 0.002<br>(-0.062 to 0.065)      | 0.037<br>(-0.026 to 0.099)      |
| Comorbidities           | -0.003<br>(-0.066 to 0.060)     | -0.007<br>(-0.067 to 0.052)     | -0.049*<br>(-0.106 to 0.009)    |
| Heart Condition         | 0.023<br>(-0.048 to 0.093)      | 0.024<br>(-0.042 to 0.090)      | 0.018<br>(-0.048 to 0.083)      |
| Parent Dementia         | -0.011<br>(-0.095 to 0.074)     | -0.079*<br>(-0.161 to 0.003)    | -0.098**<br>(-0.178 to -0.018)  |
| Missing Parent Dementia | -0.007<br>(-0.067 to 0.053)     | -0.026<br>(-0.080 to 0.029)     | -0.018<br>(-0.072 to 0.035)     |
| Attends Religious       | -0.031<br>(-0.085 to 0.024)     | -0.048*<br>(-0.099 to 0.003)    | -0.001<br>(-0.051 to 0.049)     |
| Constant                | 0.770***<br>(0.558 to 0.982)    | 1.175***<br>(0.974 to 1.376)    | 1.019***<br>(0.821 to 1.217)    |
| Observations            | 1,291                           | 1,291                           | 1,291                           |

Notes: 95% Confidence intervals in parentheses. Analyses estimate whether the respondent has a treatment preference. The reference group includes respondents who reported they were 'unsure' if they wanted a treatment or not. Models were estimated using ordinary least squares regression with robust standard errors. Statistical significance is indicated by \* p<0.10, \*\* p<0.05, \*\*\* p<0.01

**Table S14. Linear probability models estimating factors associated with specifying a treatment preference with a more restrictive cognitive impairment measure for minority respondents for the heart attack scenario**

|                         | Life-extending                  | Limited                         | Comfort                         |
|-------------------------|---------------------------------|---------------------------------|---------------------------------|
| Cognitive Impairment    | 0.002<br>(-0.081 to 0.084)      | -0.051<br>(-0.134 to 0.032)     | -0.014<br>(-0.097 to 0.069)     |
| Age                     | 0.002<br>(-0.001 to 0.005)      | -0.005***<br>(-0.008 to -0.002) | -0.004***<br>(-0.007 to -0.002) |
| Female                  | -0.047*<br>(-0.101 to 0.008)    | 0.037<br>(-0.016 to 0.089)      | 0.027<br>(-0.023 to 0.077)      |
| Black                   | -0.103***<br>(-0.176 to -0.029) | -0.017<br>(-0.084 to 0.049)     | -0.082**<br>(-0.150 to -0.013)  |
| Other                   | -0.033<br>(-0.125 to 0.059)     | -0.044<br>(-0.134 to 0.045)     | -0.061<br>(-0.146 to 0.025)     |
| Hispanic                | -0.128***<br>(-0.220 to -0.035) | -0.134***<br>(-0.224 to -0.045) | -0.106**<br>(-0.193 to -0.019)  |
| Married                 | -0.026<br>(-0.086 to 0.034)     | 0.036<br>(-0.022 to 0.093)      | -0.002<br>(-0.057 to 0.053)     |
| < High School           | -0.010<br>(-0.095 to 0.076)     | -0.065<br>(-0.153 to 0.023)     | -0.034<br>(-0.120 to 0.052)     |
| College                 | -0.003<br>(-0.066 to 0.059)     | 0.021<br>(-0.038 to 0.079)      | 0.072**<br>(0.017 to 0.127)     |
| > Median Wealth         | 0.032<br>(-0.028 to 0.091)      | 0.045<br>(-0.013 to 0.103)      | 0.077***<br>(0.020 to 0.134)    |
| Have Children           | 0.036<br>(-0.055 to 0.127)      | -0.049<br>(-0.130 to 0.031)     | -0.039<br>(-0.118 to 0.040)     |
| Hospitalized            | -0.033<br>(-0.100 to 0.033)     | 0.031<br>(-0.031 to 0.093)      | 0.049<br>(-0.010 to 0.109)      |
| Fair/poor Health        | 0.079**<br>(0.014 to 0.144)     | 0.033<br>(-0.029 to 0.096)      | 0.070**<br>(0.010 to 0.131)     |
| Comorbidities           | -0.008<br>(-0.071 to 0.055)     | -0.005<br>(-0.064 to 0.054)     | -0.026<br>(-0.083 to 0.031)     |
| Heart Condition         | 0.024<br>(-0.045 to 0.094)      | -0.003<br>(-0.070 to 0.064)     | 0.035<br>(-0.030 to 0.100)      |
| Parent Dementia         | -0.006<br>(-0.090 to 0.078)     | -0.103**<br>(-0.188 to -0.018)  | -0.066*<br>(-0.144 to 0.012)    |
| Missing Parent Dementia | -0.003<br>(-0.062 to 0.057)     | 0.021<br>(-0.035 to 0.077)      | -0.029<br>(-0.083 to 0.025)     |
| Attends Religious       | -0.045<br>(-0.099 to 0.009)     | -0.039<br>(-0.090 to 0.013)     | -0.014<br>(-0.064 to 0.036)     |
| Constant                | 0.575***<br>(0.363 to 0.786)    | 1.064***<br>(0.868 to 1.262)    | 1.045***<br>(0.848 to 1.240)    |
| Observations            | 1,291                           | 1,291                           | 1,291                           |

Notes: 95% Confidence intervals in parentheses. Analyses estimate whether the respondent has a treatment preference. The reference group includes respondents who reported they were 'unsure' if they wanted a treatment or not. Models were estimated using ordinary least squares regression with robust standard errors. Statistical significance is indicated by \* p<0.10, \*\* p<0.05, \*\*\* p<0.01

**Table S15. Linear probability models estimating factors associated with wanting treatment with a more restrictive cognitive impairment measure for minority respondents for the dementia scenario**

|                         | Life-extending                  | Limited                         | Comfort                         |
|-------------------------|---------------------------------|---------------------------------|---------------------------------|
| Cognitive Impairment    | 0.097*<br>(-0.005 to 0.199)     | -0.010<br>(-0.105 to 0.085)     | -0.015<br>(-0.089 to 0.060)     |
| Age                     | -0.005***<br>(-0.008 to -0.002) | -0.003*<br>(-0.007 to 0.000)    | -0.004***<br>(-0.006 to -0.001) |
| Female                  | -0.081***<br>(-0.141 to -0.021) | 0.031<br>(-0.029 to 0.092)      | 0.024<br>(-0.017 to 0.065)      |
| Black                   | 0.234***<br>(0.136 to 0.331)    | 0.132***<br>(0.064 to 0.199)    | -0.045<br>(-0.102 to 0.012)     |
| Other                   | 0.075<br>(-0.037 to 0.186)      | 0.048<br>(-0.055 to 0.151)      | -0.024<br>(-0.100 to 0.053)     |
| Hispanic                | 0.0004<br>(-0.106 to 0.107)     | -0.020<br>(-0.121 to 0.081)     | -0.043<br>(-0.123 to 0.038)     |
| Married                 | 0.062**<br>(0.001 to 0.124)     | 0.045<br>(-0.022 to 0.112)      | -0.002<br>(-0.048 to 0.043)     |
| < High School           | 0.053<br>(-0.066 to 0.172)      | -0.028<br>(-0.122 to 0.067)     | -0.002<br>(-0.080 to 0.077)     |
| College                 | -0.011<br>(-0.072 to 0.049)     | -0.045<br>(-0.115 to 0.025)     | 0.040*<br>(-0.002 to 0.082)     |
| > Median Wealth         | -0.064**<br>(-0.128 to -0.001)  | -0.126***<br>(-0.195 to -0.058) | 0.001<br>(-0.050 to 0.052)      |
| Have Children           | -0.012<br>(-0.103 to 0.079)     | 0.093*<br>(-0.011 to 0.196)     | 0.016<br>(-0.051 to 0.083)      |
| Hospitalized            | 0.048<br>(-0.030 to 0.126)      | 0.065*<br>(-0.003 to 0.133)     | 0.008<br>(-0.038 to 0.053)      |
| Fair/poor Health        | -0.025<br>(-0.099 to 0.048)     | -0.044<br>(-0.115 to 0.028)     | -0.009<br>(-0.063 to 0.046)     |
| Comorbidities           | 0.039<br>(-0.028 to 0.105)      | -0.037<br>(-0.106 to 0.032)     | 0.011<br>(-0.035 to 0.057)      |
| Heart Condition         | 0.040<br>(-0.033 to 0.113)      | 0.036<br>(-0.040 to 0.111)      | 0.012<br>(-0.039 to 0.062)      |
| Parent Dementia         | -0.055<br>(-0.137 to 0.028)     | -0.028<br>(-0.126 to 0.070)     | 0.023<br>(-0.034 to 0.080)      |
| Missing Parent Dementia | 0.003<br>(-0.063 to 0.068)      | 0.037<br>(-0.024 to 0.099)      | 0.006<br>(-0.036 to 0.048)      |
| Attends Religious       | 0.036<br>(-0.020 to 0.091)      | 0.036<br>(-0.023 to 0.096)      | 0.019<br>(-0.020 to 0.059)      |
| Constant                | 0.495***<br>(0.275 to 0.715)    | 0.854***<br>(0.613 to 1.095)    | 1.100***<br>(0.945 to 1.254)    |
| Observations            | 783                             | 901                             | 933                             |

Notes: 95% Confidence intervals in parentheses. Models estimate whether the respondent reported that they would 'want' the treatment option conditional on having a treatment preference. The reference group are those who would 'not want' the treatment option. Analyses are restricted to respondents who had a treatment preference (i.e., those who selected 'unsure' are excluded). Models were estimated using ordinary least squares regression with robust standard errors. Statistical significance is indicated by \* p<0.10, \*\* p<0.05, \*\*\* p<0.01

**Table S16. Linear probability models estimating factors associated with wanting treatment with a more restrictive cognitive impairment measure for minority respondents for the heart attack scenario**

|                         | Life-extending                  | Limited                         | Comfort                         |
|-------------------------|---------------------------------|---------------------------------|---------------------------------|
| Cognitive Impairment    | 0.086*<br>(-0.009 to 0.180)     | -0.098*<br>(-0.200 to 0.004)    | -0.100**<br>(-0.188 to -0.012)  |
| Age                     | -0.006***<br>(-0.009 to -0.003) | -0.008***<br>(-0.011 to -0.004) | -0.003***<br>(-0.006 to -0.001) |
| Female                  | -0.022<br>(-0.080 to 0.035)     | 0.075**<br>(0.014 to 0.136)     | 0.031<br>(-0.013 to 0.074)      |
| Black                   | 0.205***<br>(0.117 to 0.293)    | 0.091**<br>(0.019 to 0.163)     | -0.069**<br>(-0.132 to -0.005)  |
| Other                   | 0.067<br>(-0.038 to 0.172)      | 0.029<br>(-0.076 to 0.134)      | -0.018<br>(-0.097 to 0.060)     |
| Hispanic                | -0.062<br>(-0.162 to 0.037)     | -0.035<br>(-0.136 to 0.066)     | -0.062<br>(-0.146 to 0.023)     |
| Married                 | 0.044<br>(-0.017 to 0.106)      | 0.080**<br>(0.013 to 0.148)     | -0.004<br>(-0.052 to 0.043)     |
| < High School           | 0.055<br>(-0.048 to 0.158)      | 0.073<br>(-0.017 to 0.163)      | 0.044<br>(-0.037 to 0.125)      |
| College                 | 0.017<br>(-0.046 to 0.080)      | 0.033<br>(-0.036 to 0.102)      | 0.052**<br>(0.006- 0.099)       |
| > Median Wealth         | -0.028<br>(-0.089 to 0.033)     | -0.048<br>(-0.117 to 0.021)     | -0.029<br>(-0.081 to 0.024)     |
| Have Children           | -0.040<br>(-0.140 to 0.059)     | 0.006<br>(-0.092 to 0.103)      | 0.017<br>(-0.054 to 0.087)      |
| Hospitalized            | 0.025<br>(-0.046 to 0.097)      | 0.057<br>(-0.012 to 0.126)      | 0.034<br>(-0.013 to 0.081)      |
| Fair/poor Health        | -0.019<br>(-0.091 to 0.052)     | -0.015<br>(-0.086 to 0.055)     | -0.046<br>(-0.104 to 0.012)     |
| Comorbidities           | 0.064*<br>(-0.002 to 0.129)     | -0.002<br>(-0.070 to 0.066)     | 0.046*<br>(-0.002 to 0.094)     |
| Heart Condition         | 0.044<br>(-0.028 to 0.116)      | -0.008<br>(-0.085 to 0.069)     | -0.020<br>(-0.073 to 0.033)     |
| Parent Dementia         | -0.067<br>(-0.151 to 0.018)     | 0.036<br>(-0.064 to 0.136)      | 0.023<br>(-0.043 to 0.089)      |
| Missing Parent Dementia | -0.010<br>(-0.076 to 0.055)     | 0.042<br>(-0.022 to 0.105)      | 0.042*<br>(-0.004 to 0.088)     |
| Attends Religious       | 0.022<br>(-0.034 to 0.077)      | 0.032<br>(-0.027 to 0.091)      | 0.030<br>(-0.013 to 0.073)      |
| Constant                | 0.563***<br>(0.338 to 0.788)    | 1.086***<br>(0.858 to 1.314)    | 1.055***<br>(0.893 to 1.217)    |
| Observations            | 841                             | 894                             | 939                             |

Notes: 95% Confidence intervals in parentheses. Models estimate whether the respondent reported that they would ‘want’ the treatment option conditional on having a treatment preference. The reference group are those who would ‘not want’ the treatment option. Analyses are restricted to respondents who had a treatment preference (i.e., those who selected ‘unsure’ are excluded). Models were estimated using ordinary least squares regression with robust standard errors. Statistical significance is indicated by \* p<0.10, \*\* p<0.05, \*\*\* p<0.01
